# Supplementary material for: An azo based colorimetric probe for the detection of cysteine and lysine amino acids and its real application in human blood plasma
Source: Royal Society of Chemistry journal article supplement (doi:10.1039/c4ra00375f), 2014-01-01
Supplement: c4ra00375f1.pdf [file c4ra00375f1.pdf]

## **Supporting Information**

### **Azo based colorimetric probe for detection of cysteine and lysine amino acids and its real application in human blood plasma**

Syed S. Razi, Rashid Ali, Priyanka Srivastava, Mohammad Shahid and Arvind Misra\*

Department of Chemistry, Faculty of Science, Banaras Hindu University,  
Varanasi – 221005. INDIA.

Corresponding author: e-mail: [arvindmisra2003@yahoo.com](mailto:arvindmisra2003@yahoo.com); [amisra@bhu.ac.in](mailto:amisra@bhu.ac.in)

Tel: +91-542-6702503; Fax: +91-0542-2368127, 2368175.

**Figure S1:**  $^1\text{H}$  NMR spectra of compound **3a** in  $\text{CDCl}_3$

**Figure S2:**  $^1\text{H}$  NMR spectra of compound **3b** in  $\text{CDCl}_3$

**Figure S3:**  $^{13}\text{C}$  spectra of compound **3a** in  $\text{CDCl}_3$

**Figure S4:**  $^{13}\text{C}$  spectra of compound **3b** in  $\text{CDCl}_3$

**Figure S5:** ESI-MS Mass spectrum of **3a**.

**Figure S6:** ESI-MS Mass spectrum of **3b**.

**Figure S7:** Cis-trans isomerism for receptors (a) **3a** and (b) **3b** in DMF.

**Figure S8:** Change in UV-Visible spectra and Bar diagram for **3a** and **3b** (10  $\mu\text{m}$ ) with different amino acids (50 equiv) in HEPES buffer (DMF/ $\text{H}_2\text{O}$  9:1 v/v, pH 7.4).

**Figure S9:** Change in absorption spectra of **3a** and **3b** (10  $\mu\text{m}$ ) with thiol containing compound (Cys, GSH, Mercaptoethanol, 50 equiv) in HEPES buffer (DMF/ $\text{H}_2\text{O}$  9:1 v/v, pH 7.4).

**Figure S10:** Interference studies of **3a** and **3b** (10  $\mu\text{m}$ ) with thiols containing compounds (Cys, GSH, Mercaptoethanol, 50 equiv) in HEPES buffer (DMF/ $\text{H}_2\text{O}$  9:1 v/v, pH 7.4).

**Figure S11:** Job's plot for interactions of **3a/3b** with Cys.

**Figure S12:** Job's plot for interactions of **3a/3b** with Lys.

**Figure S13:** Stacked FT-IR spectra of **3a** and **3a-Cys**.

**Figure S14:** Stacked FT-IR spectra of **3b** and **3b-Cys**.

**Figure S15:** Stacked FT-IR spectra of **3a** and **3a-Lys**.

**Figure S16:** FT-IR spectra of **3b-Lys**.

**Figure S17:**  $^1\text{H}$  NMR titration spectral changes of compound **3a** upon addition of Cysteine (0 equiv.) in  $\text{DMSO-}d_6$  at 25  $^\circ\text{C}$ .

**Figure S18:**  $^1\text{H}$  NMR titration spectral changes of compound **3a** upon addition of Cysteine (10 equiv.) in  $\text{DMSO-}d_6$  at 25  $^\circ\text{C}$ .

**Figure S19:**  $^1\text{H}$  NMR titration spectral changes of compound **3a** upon addition of Cysteine (30 equiv.) in  $\text{DMSO-}d_6$  at 25  $^\circ\text{C}$ .

**Figure S20:**  $^1\text{H}$  NMR spectral changes of compound **3a** with lysine in  $\text{CDCl}_3$  at 25  $^\circ\text{C}$ .

**Figure S21:** ESI-MS Mass spectrum of **3a-Cys**.

**Figure S22:** ESI-MS Mass spectrum of **3a-Lys**.

**Figure S23:** ESI-MS Mass spectrum of **3b-Cys**.

**Figure S24:** ESI-MS Mass spectrum of **3b-Lys**.

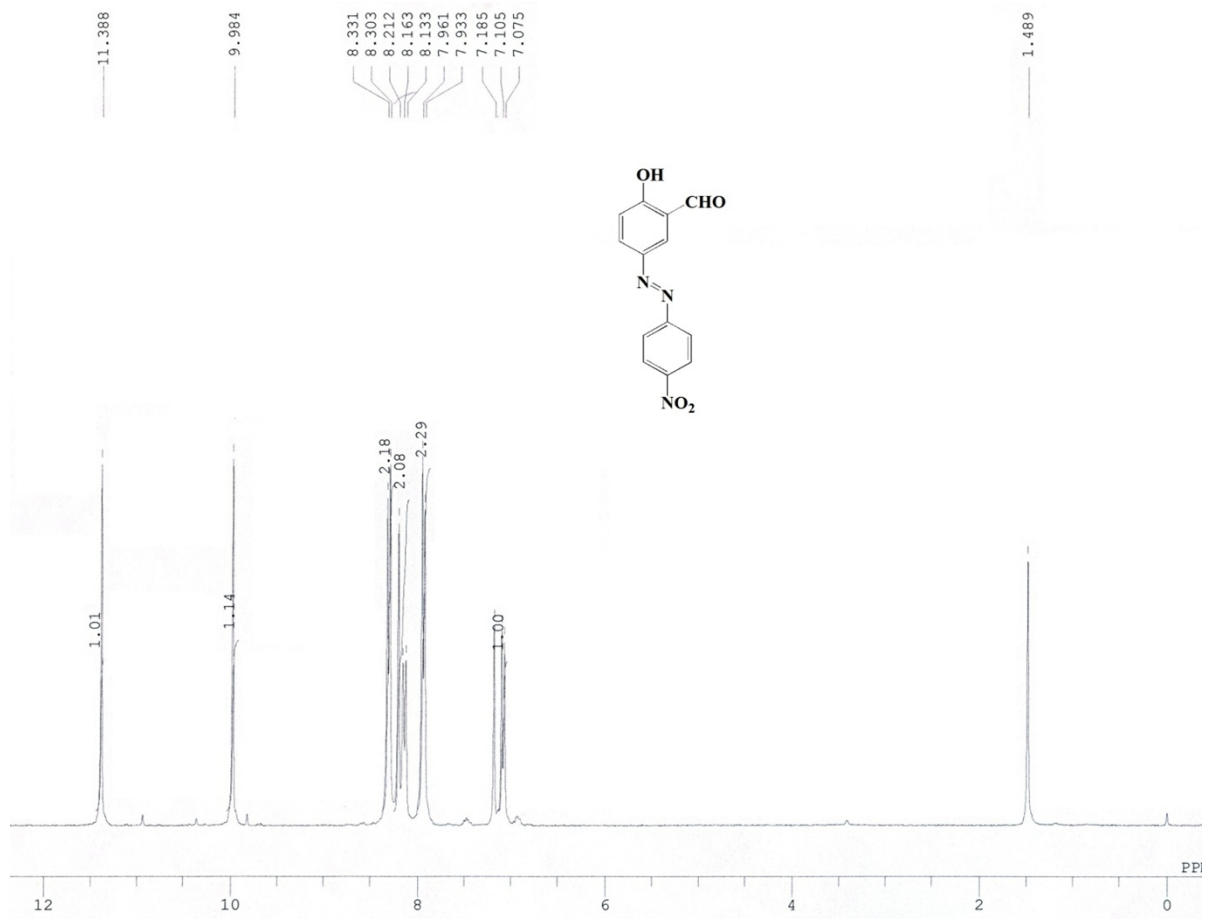

**Figure S1:**  $^1\text{H}$  NMR spectra of compound **3a** in  $\text{CDCl}_3$ .

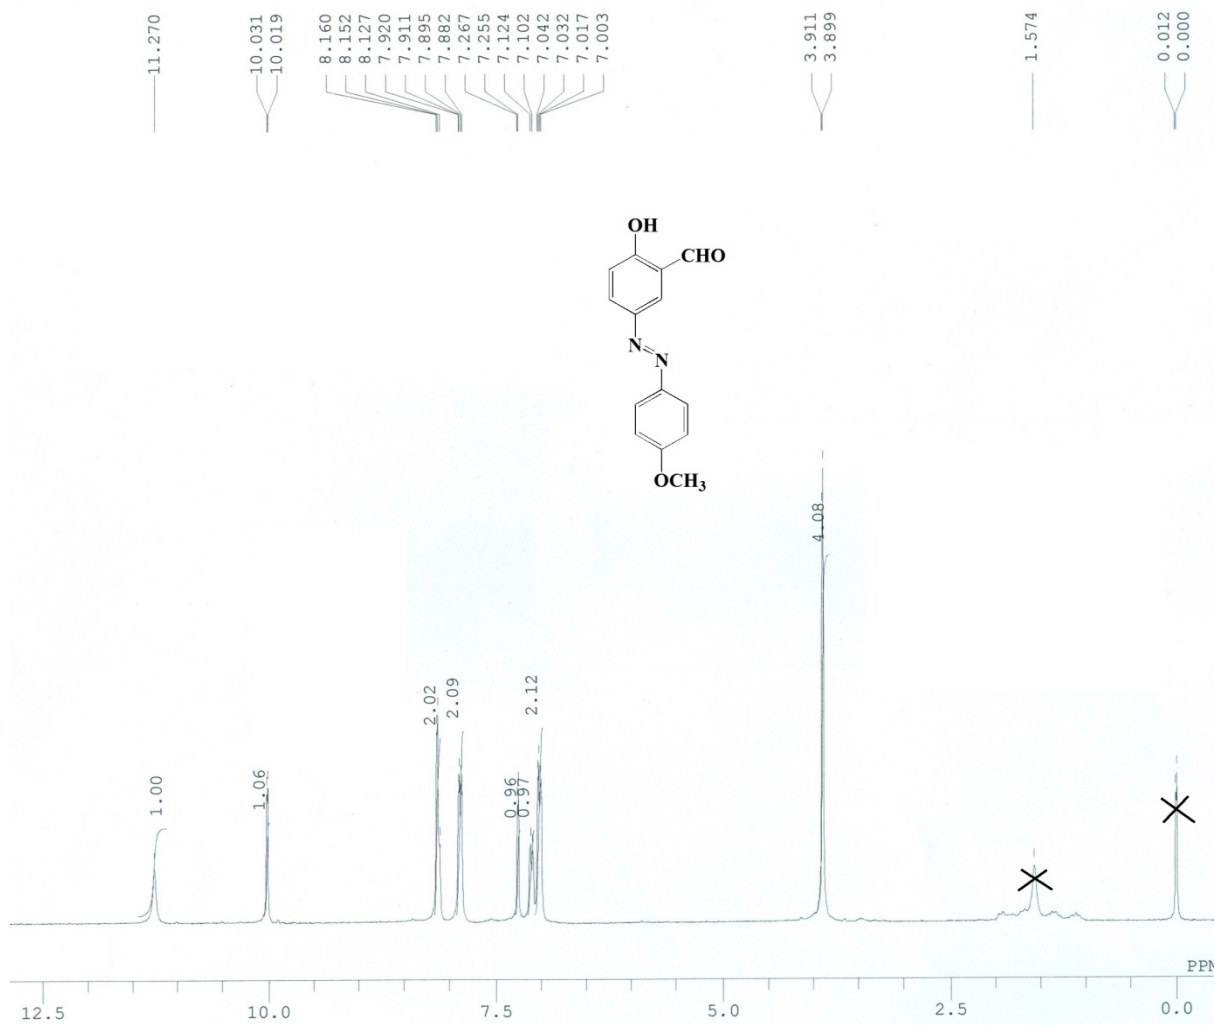

**Figure S2:** <sup>1</sup>H NMR spectra of compound **3b** in CDCl<sub>3</sub>.

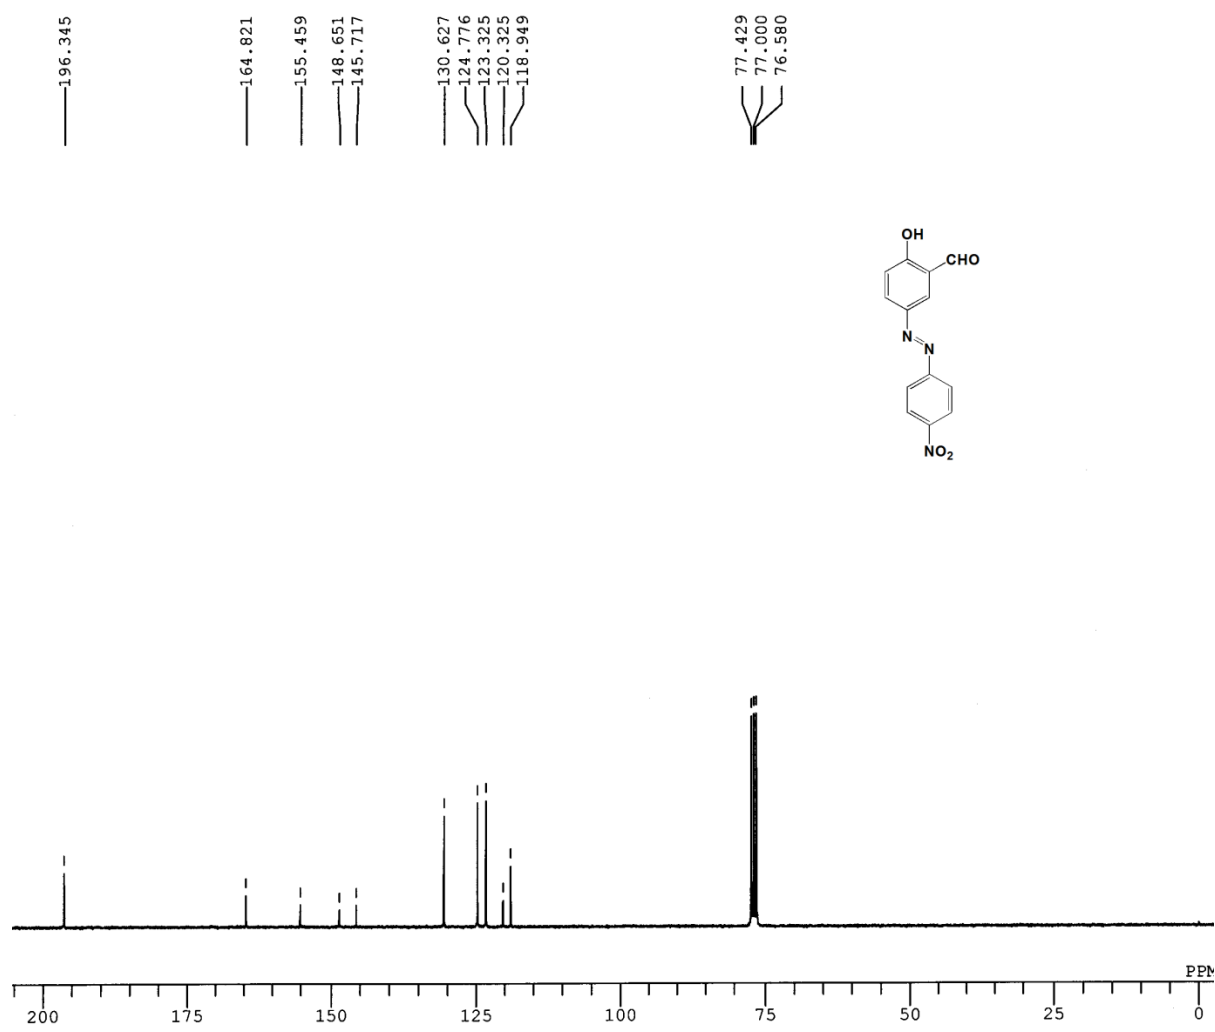

**Figure S3:**  $^{13}\text{C}$  spectra of compound **3a** in  $\text{CDCl}_3$ .

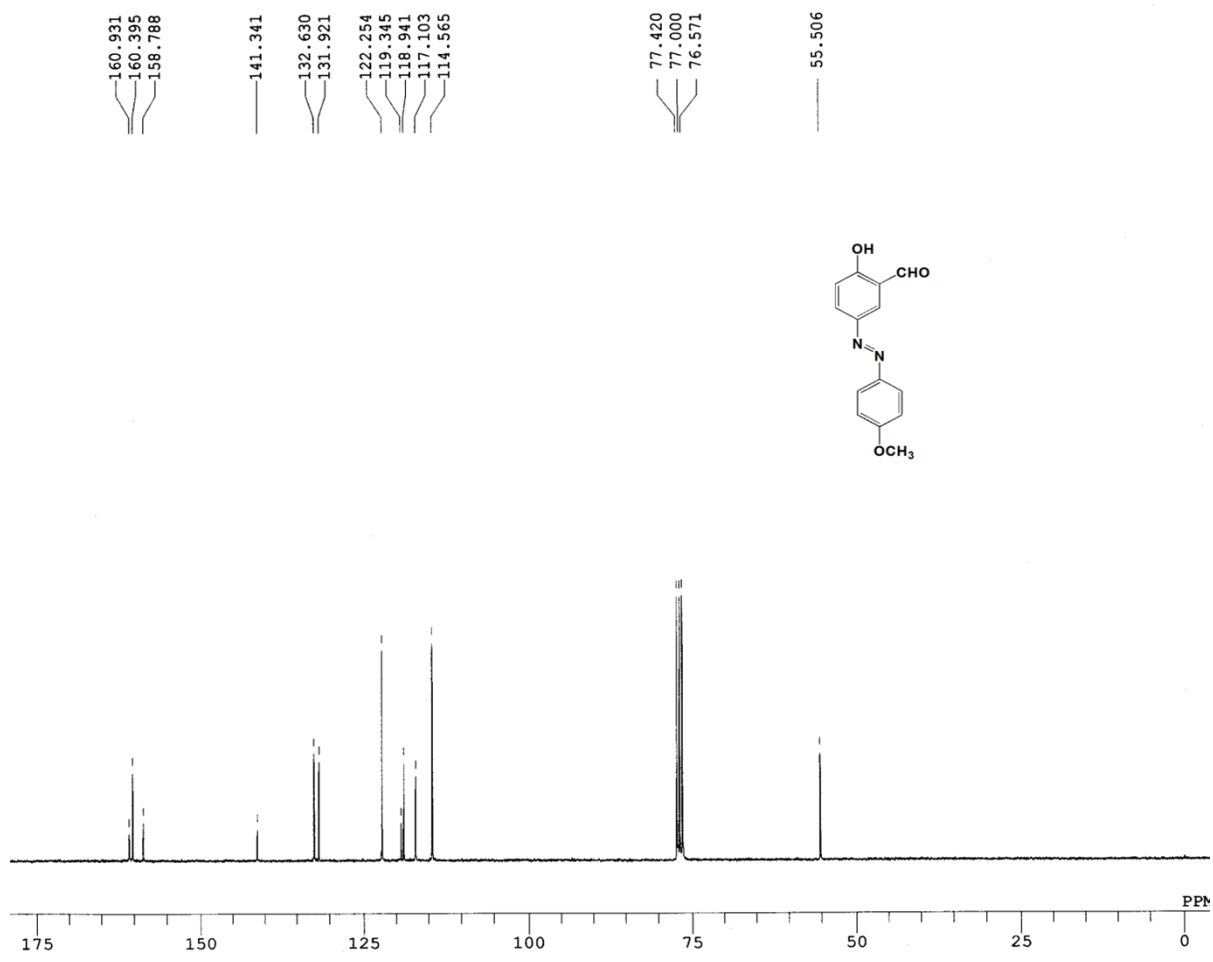

**Figure S4:**  $^{13}\text{C}$  spectra of compound **3b** in  $\text{CDCl}_3$ .

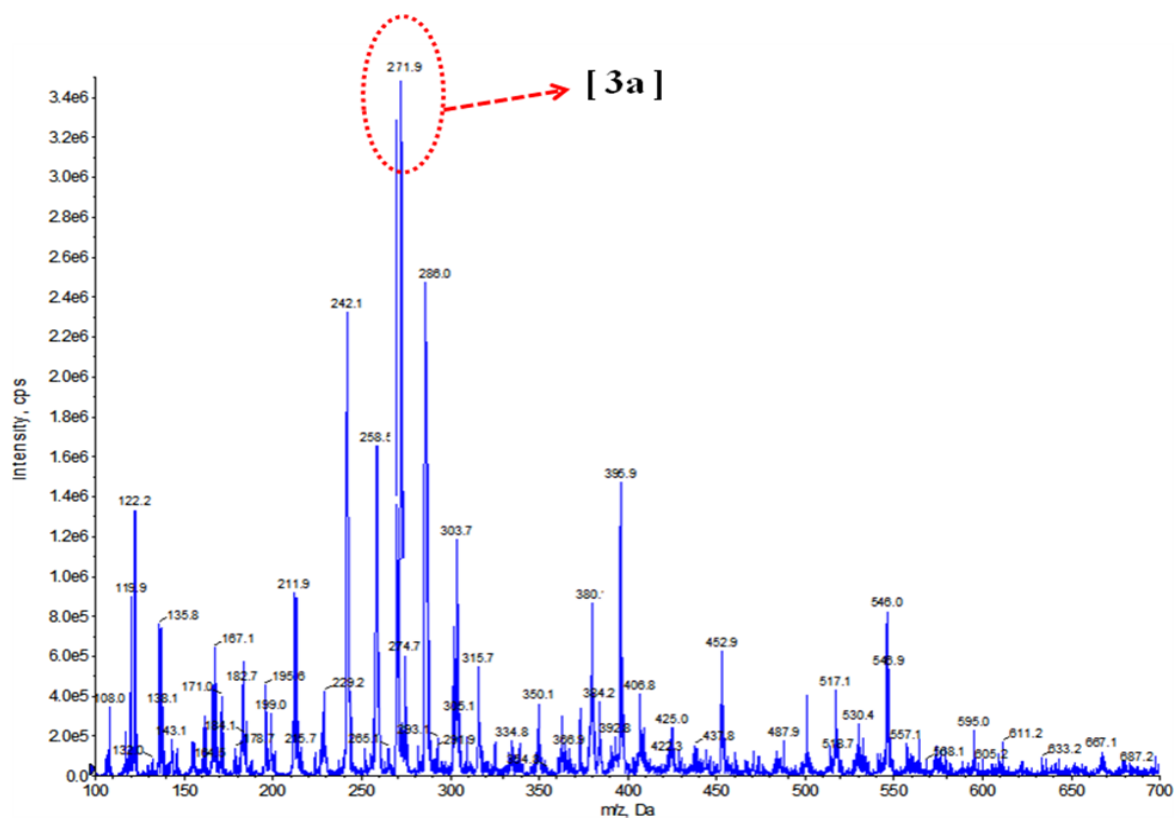

Figure S5: ESI-MS Mass spectrum of 3a.

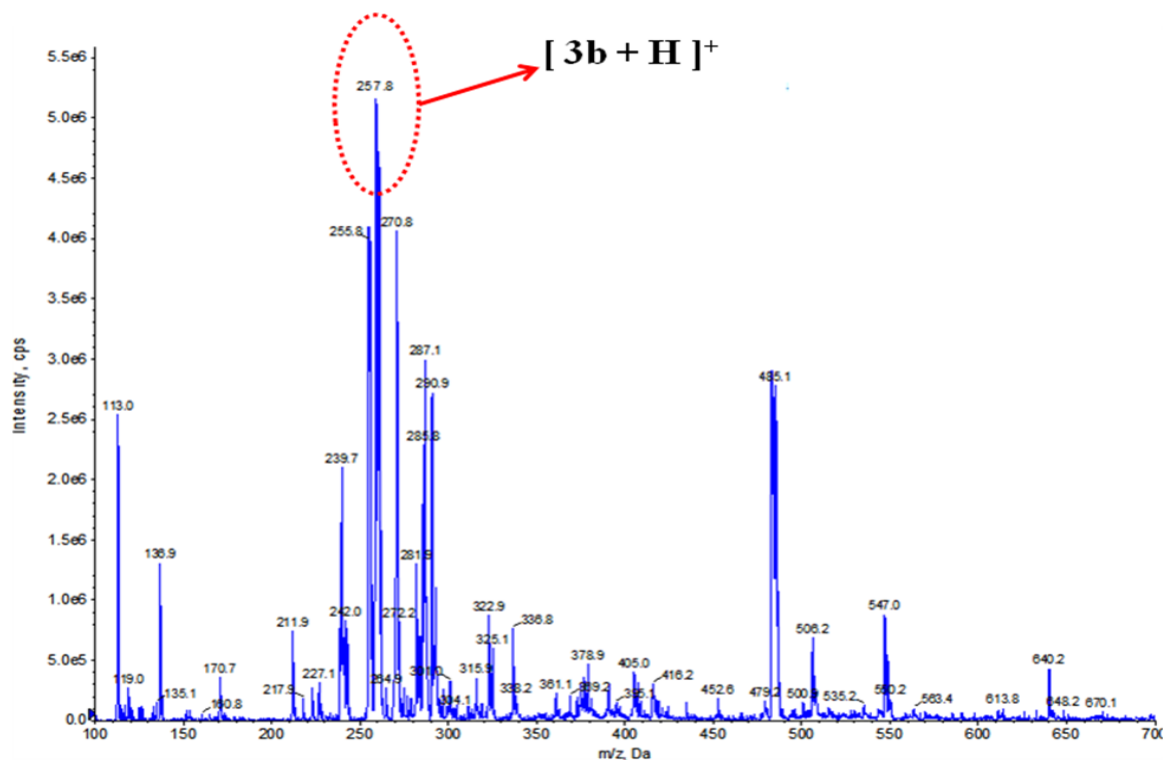

**Figure S6:** ESI-MS Mass spectrum of **3b**.

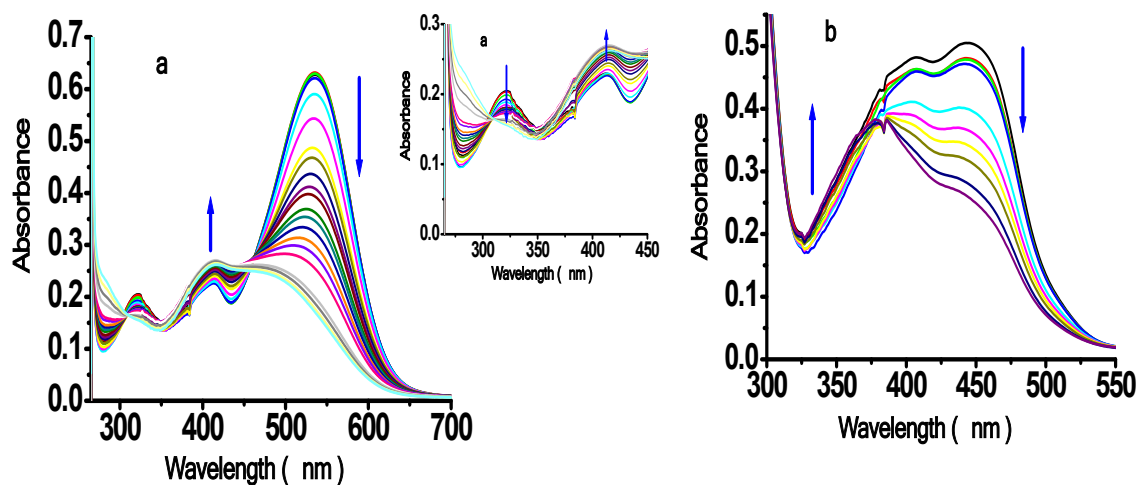

**Figure S7:** Cis-trans isomerism for receptors (a) **3a** and (b) **3b** in DMF.

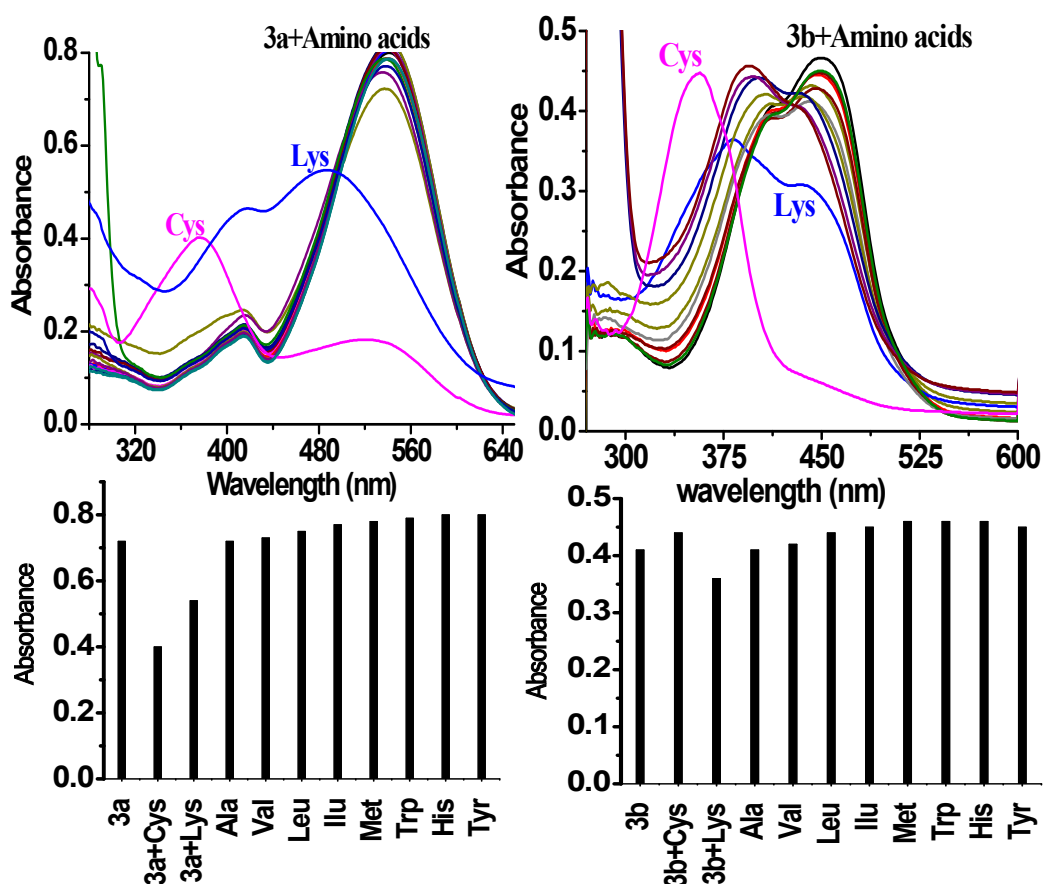

**Figure S8:** Change in UV-Visible spectra and Bar diagram for **3a** and **3b** (10  $\mu$ m) with different amino acids (50 equiv) in HEPES buffer (DMF/H<sub>2</sub>O 9:1 v/v, pH 7.4).



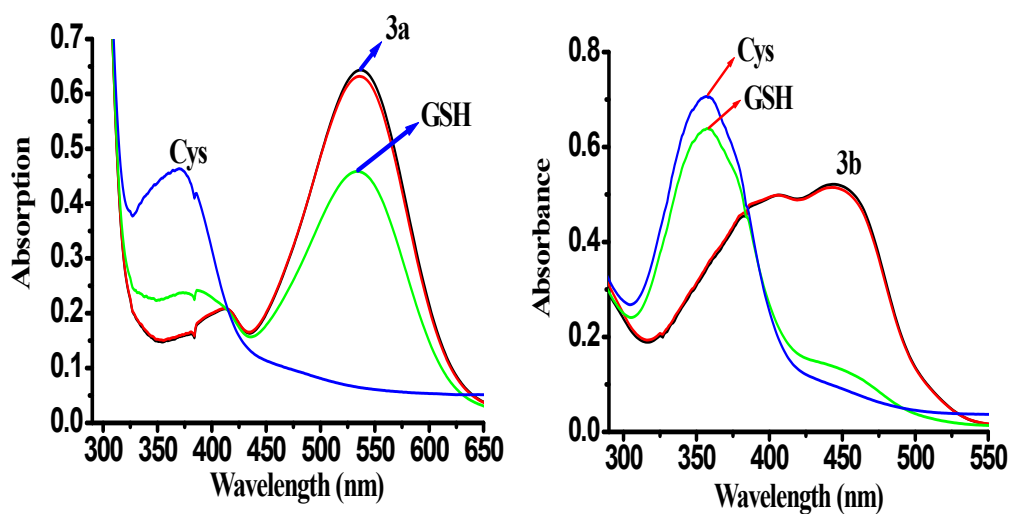

**Figure S9:** Change in absorption spectra of **3a** and **3b** (10  $\mu\text{m}$ ) with thiol containing compound (Cys, GSH, Mercaptoethanol, 50 equiv) in HEPES buffer (DMF/H<sub>2</sub>O 9:1 v/v, pH 7.4).

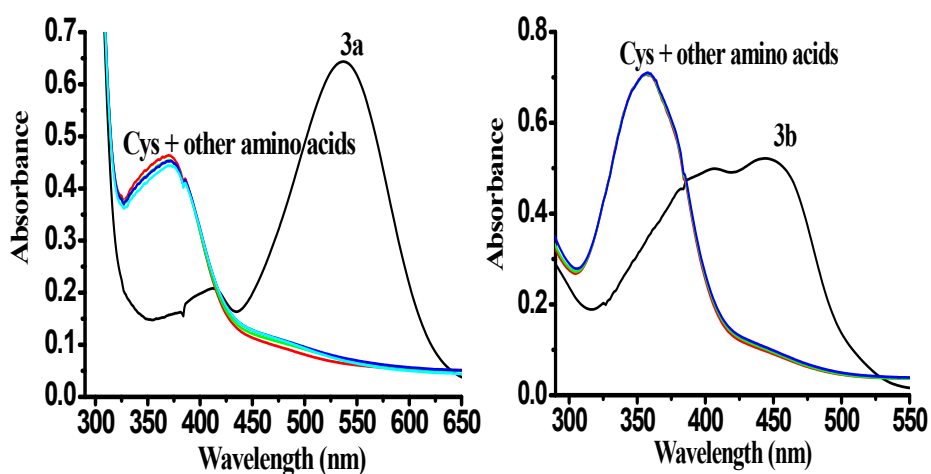

**Figure S10:** Interference studies of **3a** and **3b** (10  $\mu\text{m}$ ) with thiols containing compounds (Cys, GSH, Mercaptoethanol, 50 equiv) in HEPES buffer (DMF/H<sub>2</sub>O 9:1 v/v, pH 7.4).

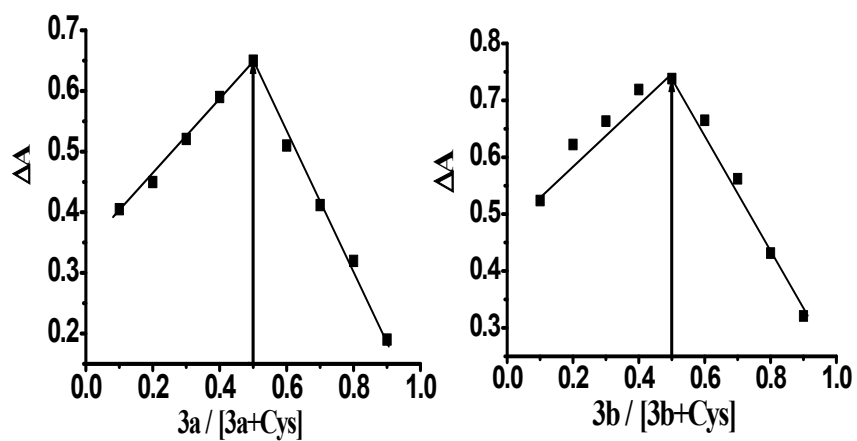

**Figure S11:** Job's plot for interactions of **3a/3b** with Cys.

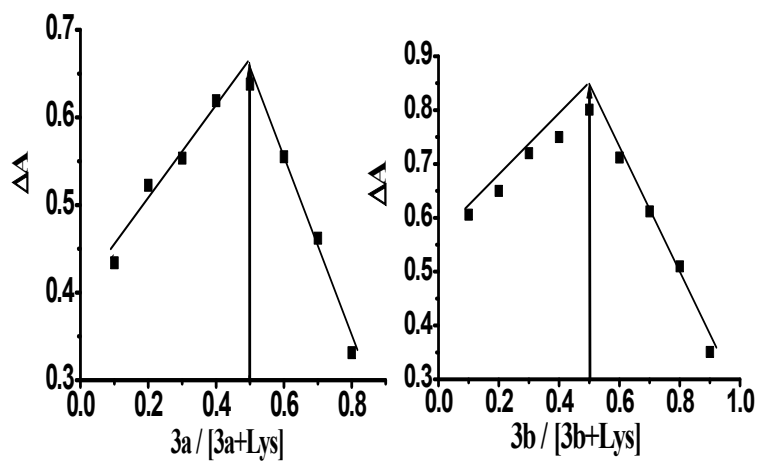

**Figure S12:** Job's plot for interactions of **3a/3b** with Lys.

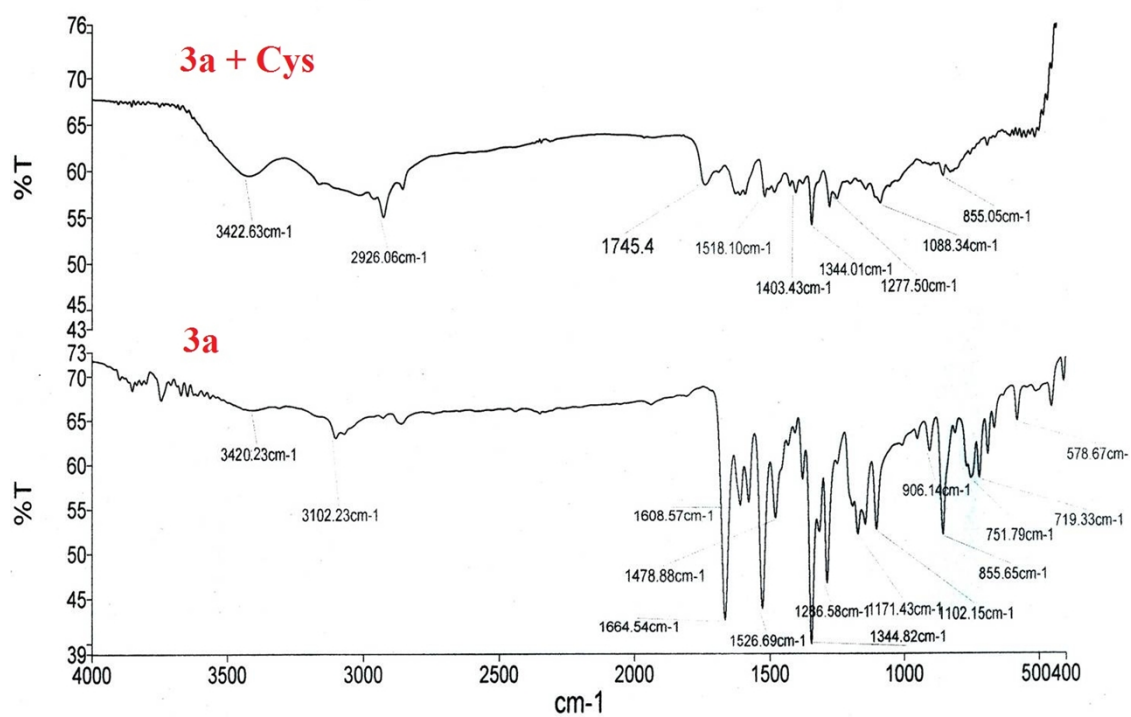

**Figure S13:** Stacked FT-IR spectra of **3a** and **3a-Cys**.

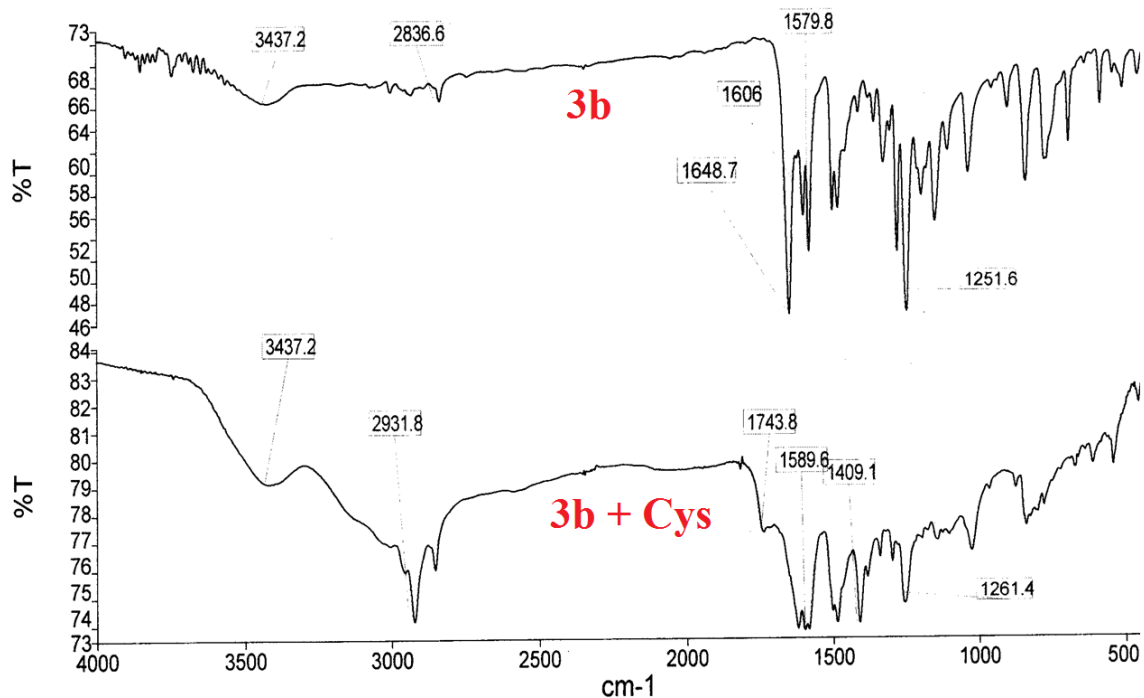

**Figure S14:** Stacked FT-IR spectra of **3b** and **3b-Cys**.

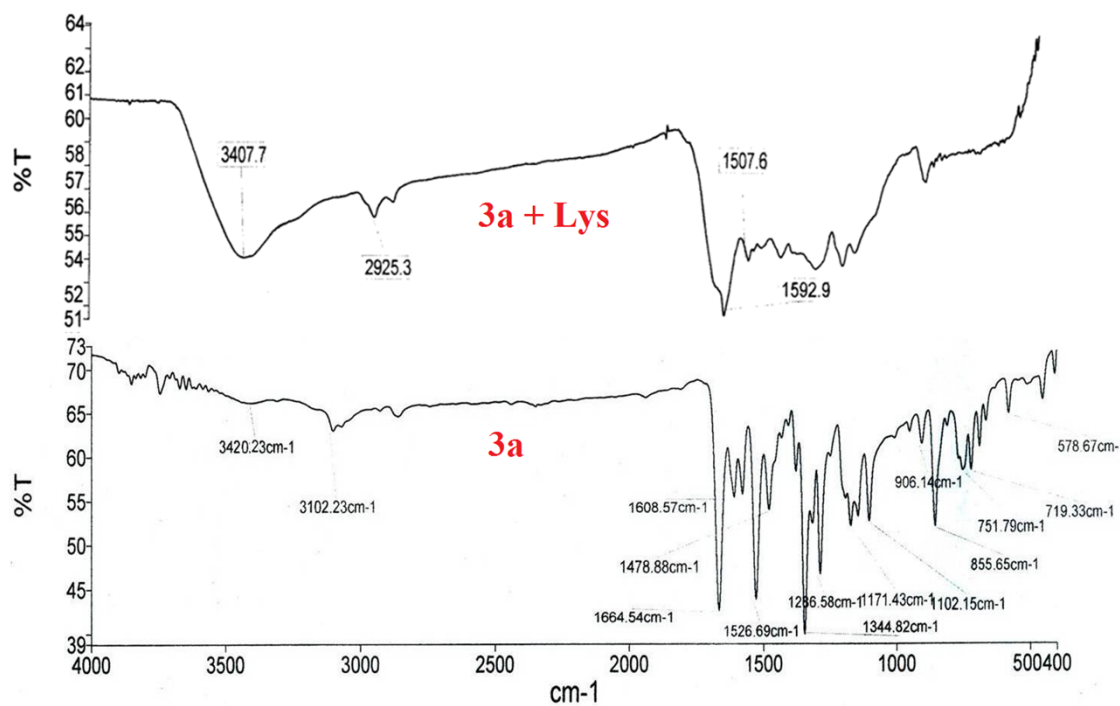

**Figure S15:** Stacked FT-IR spectra of **3a** and **3a-Lys**.

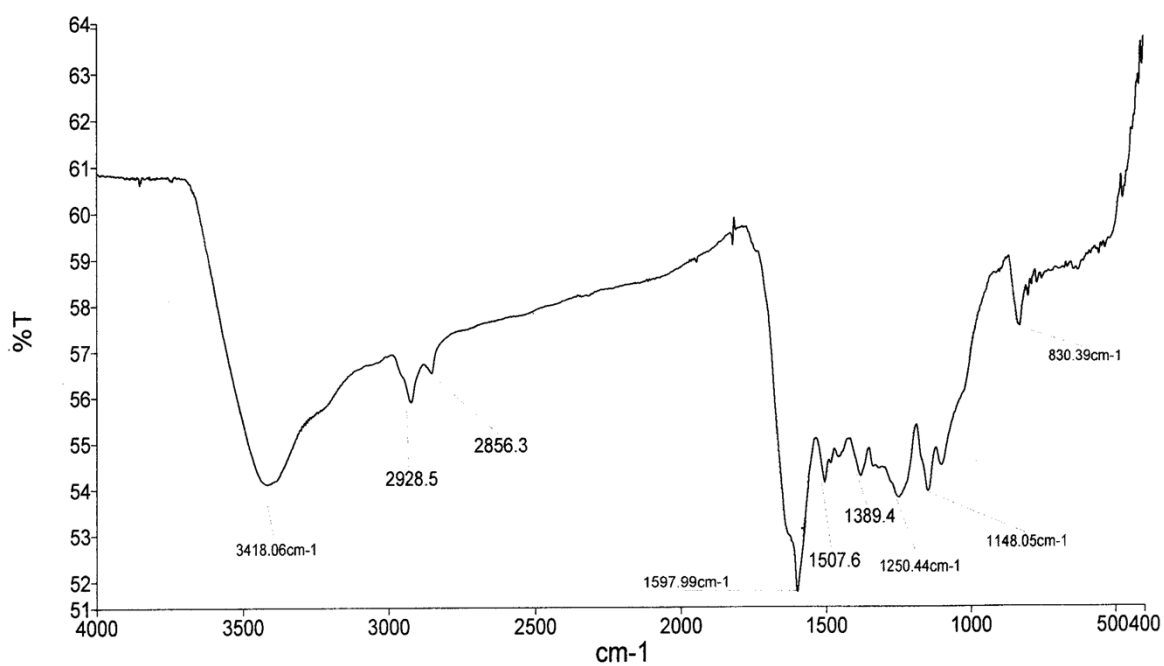

**Figure S16:** FT-IR spectra of **3b-Lys**.

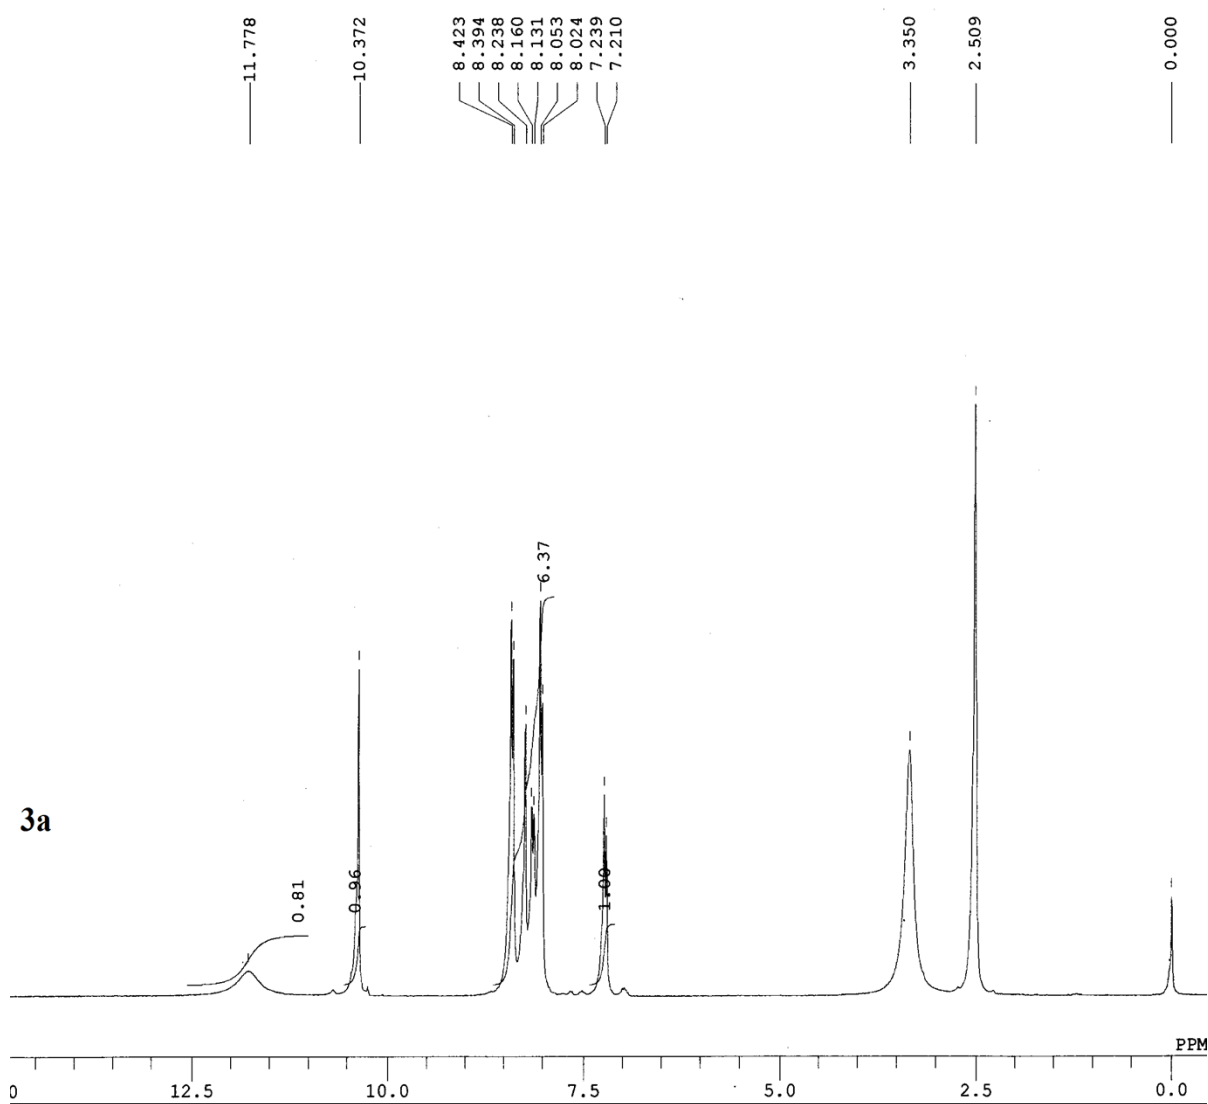

**Figure S17:**  $^1\text{H}$  NMR titration spectral changes of compound **3a** upon addition of Cysteine (0 equiv.) in  $\text{DMSO-}d_6$  at 25 °C.

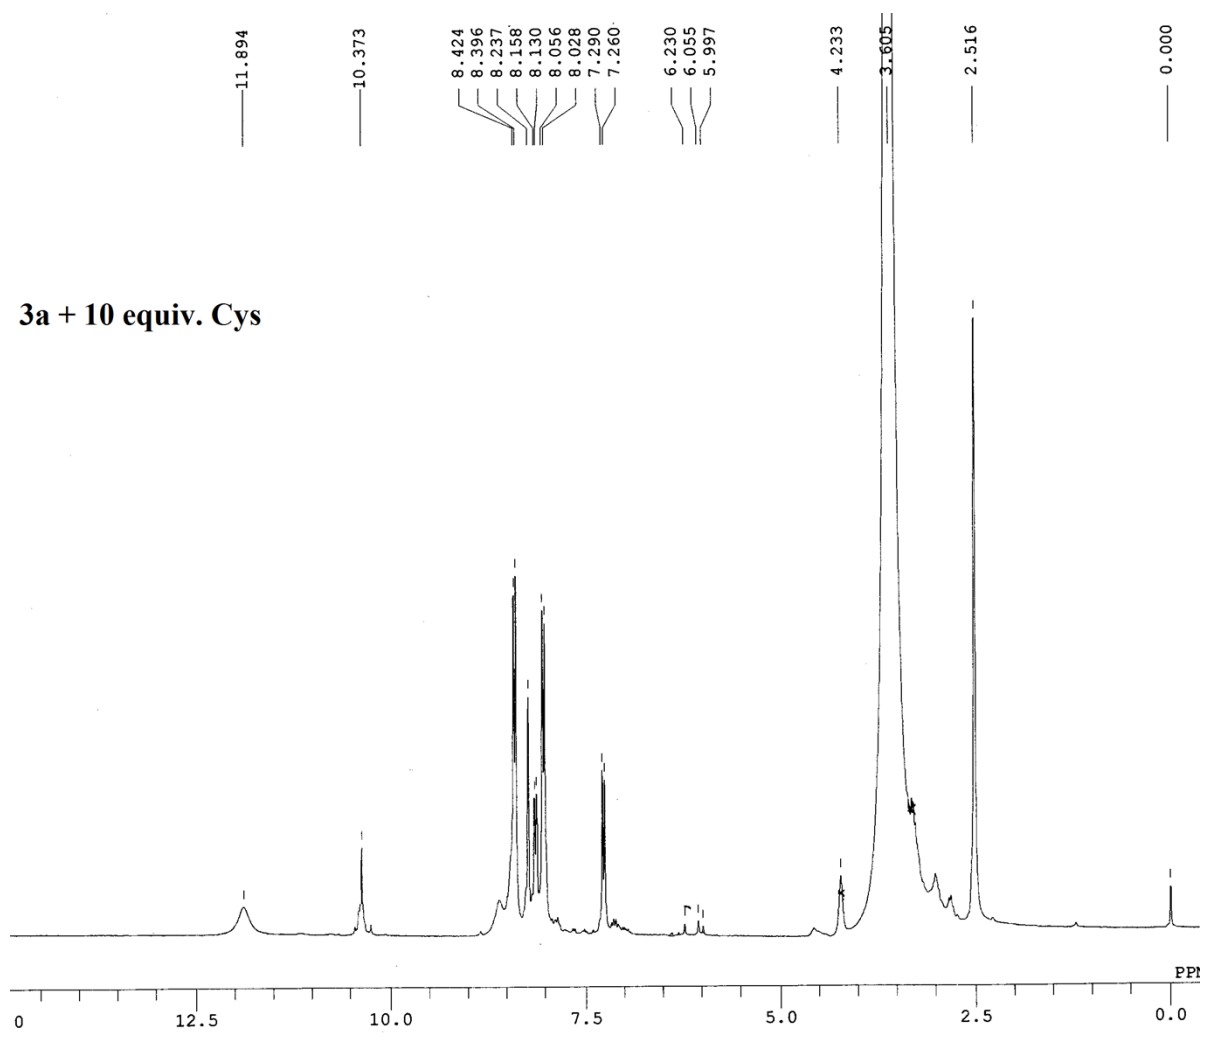

**Figure S18:**  $^1\text{H}$  NMR titration spectral changes of compound **3a** upon addition of Cysteine (10 equiv.) in  $\text{DMSO-}d_6$  at 25 °C.

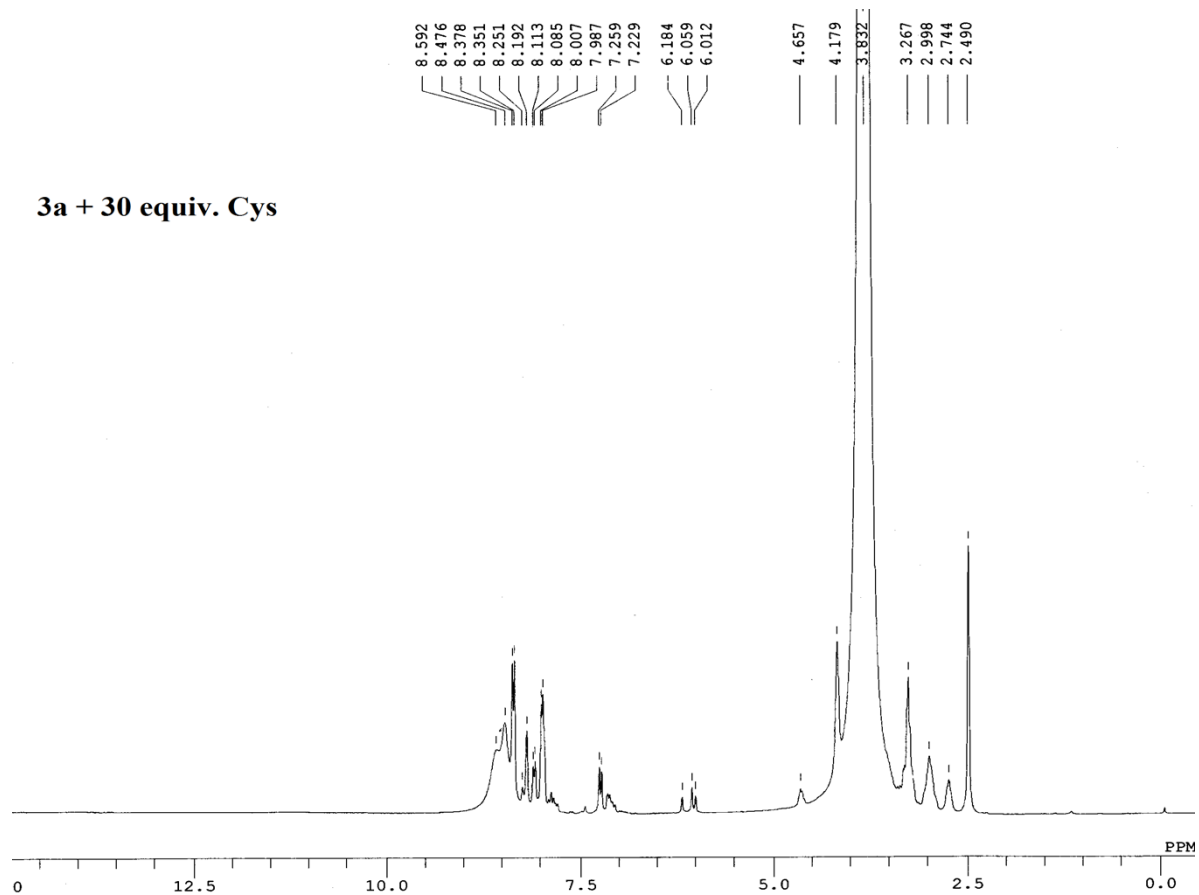

**Figure S19:**  $^1\text{H}$  NMR titration spectral changes of compound **3a** upon addition of Cysteine (30 equiv.) in  $\text{DMSO-}d_6$  at 25 °C.

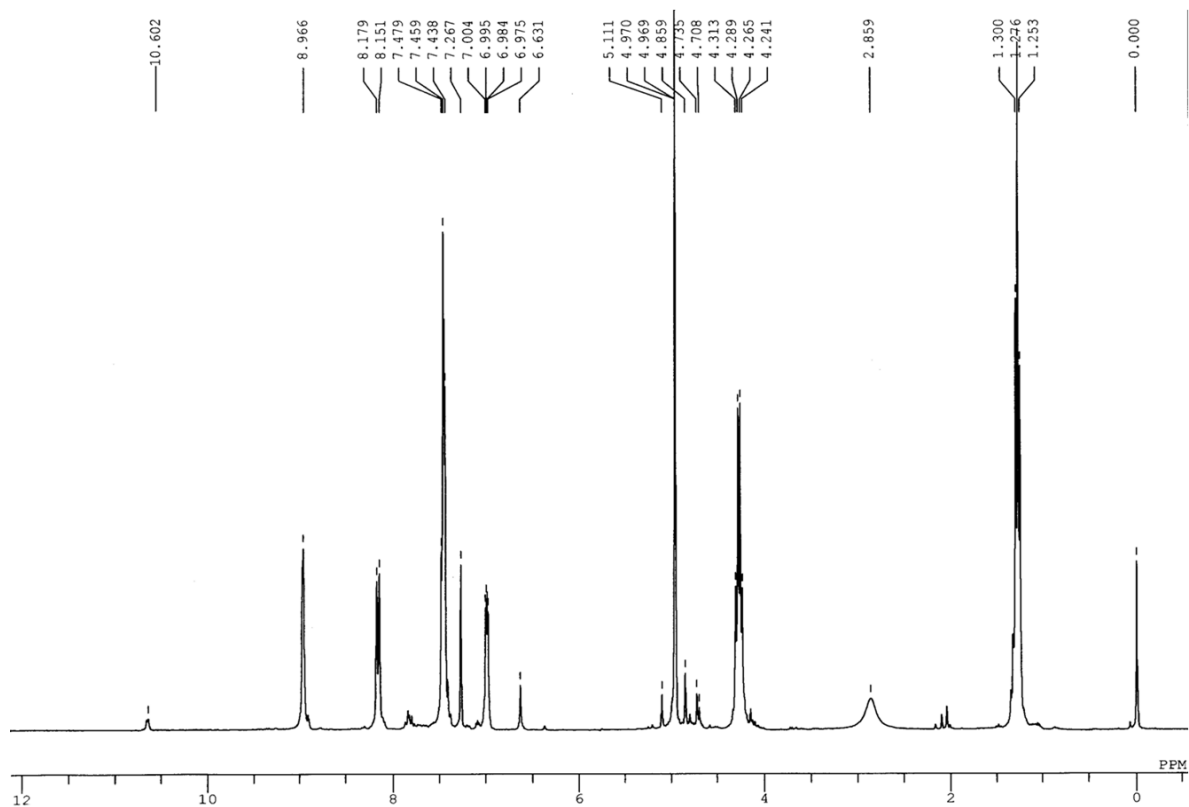

**Figure S20:**  $^1\text{H}$  NMR spectral changes of compound **3a** with lysine in  $\text{CDCl}_3$  at 25 °C.

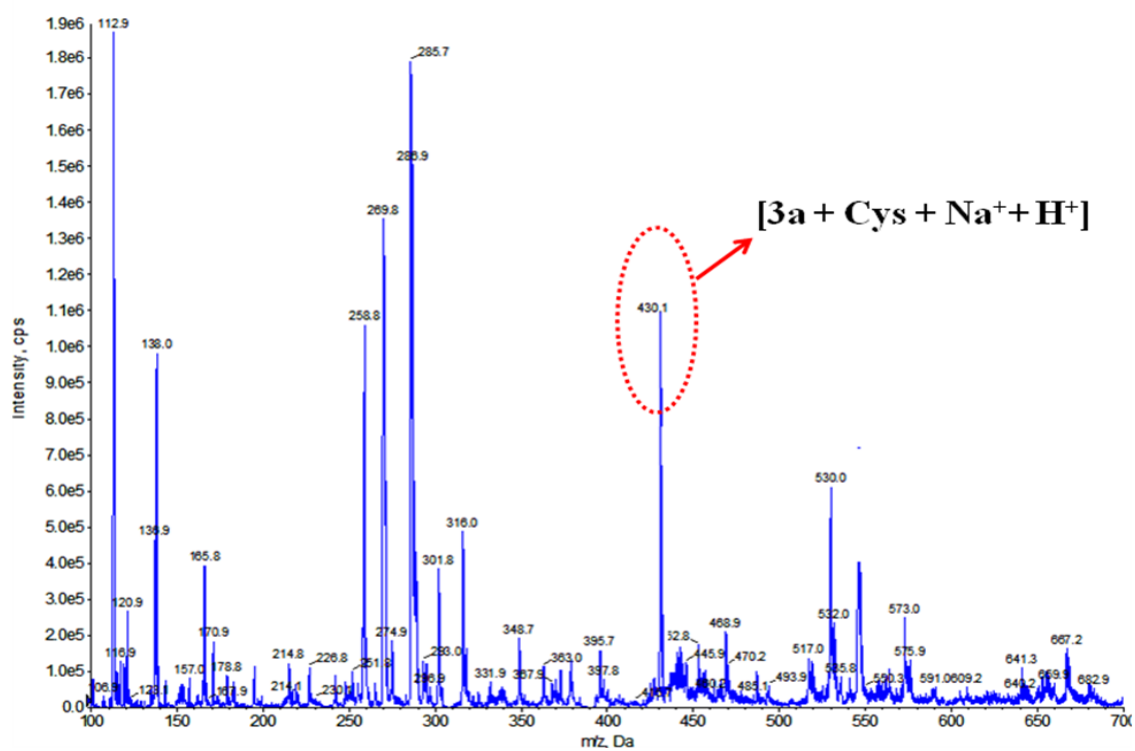

**Figure S21:** ESI-MS Mass spectrum of **3a-Cys**.



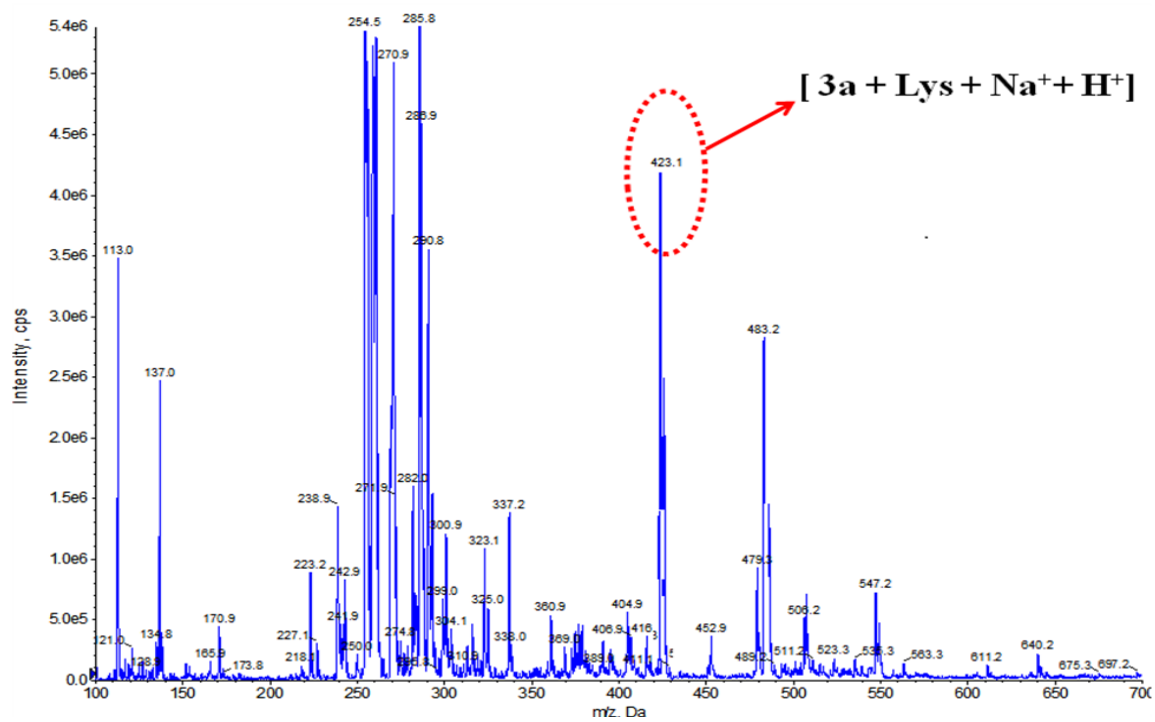

Figure S22: ESI-MS Mass spectrum of 3a-Lys.

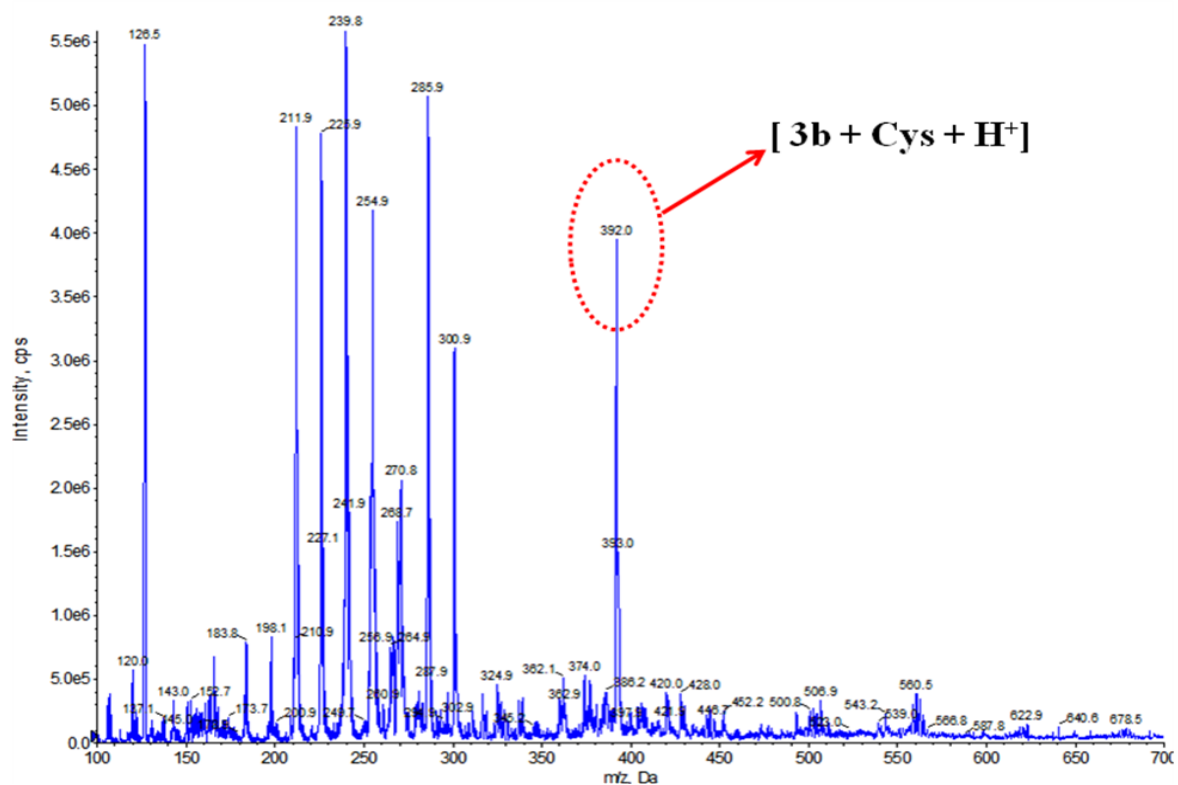

Figure S23: ESI-MS Mass spectrum of 3b-Cys.

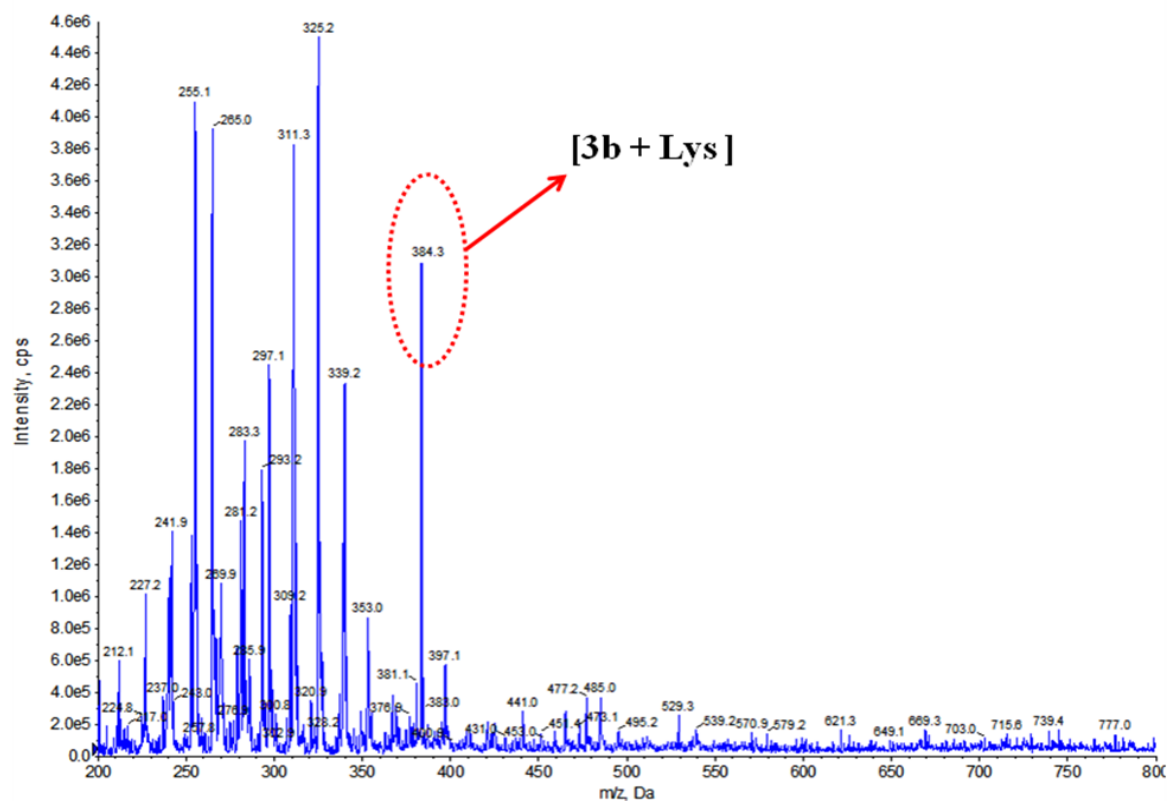

**Figure S24:** ESI-MS Mass spectrum of **3b-Lys**.
